# Supplementary material for: A core microbiome associated with the peritoneal tumors of pseudomyxoma peritonei
Source: PubMed Central journal article supplement (PMC3729368; doi:10.1186/1750-1172-8-105), 2013-07-12
Supplement: 1750-1172-8-105-S1.pdf [file 1750-1172-8-105-S1.pdf]

## Supplemental information

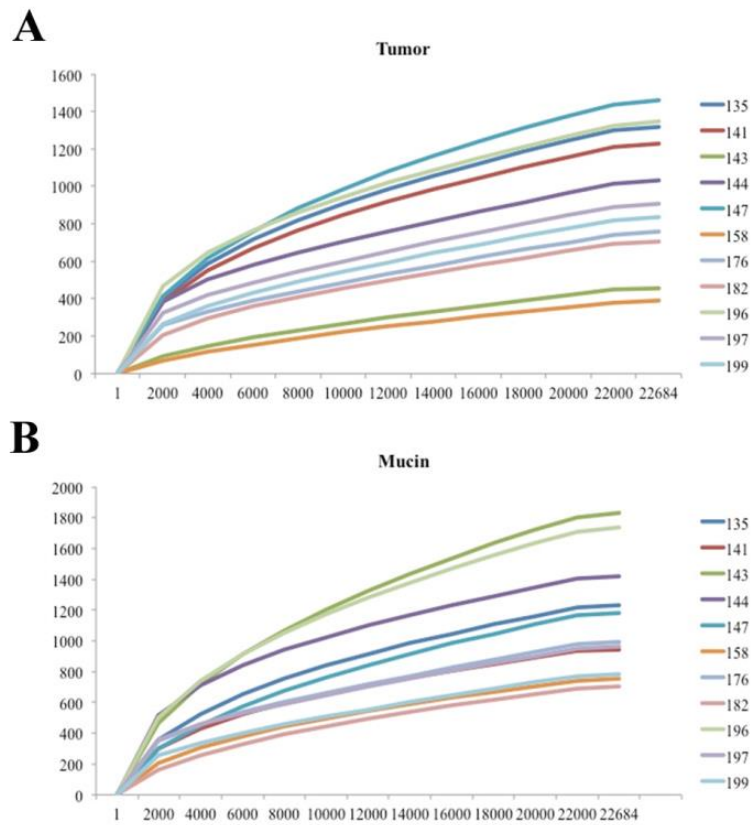

**Figure S1. Rarefaction analysis of individual Tumor (A) and Mucin (B) samples.** Normalized observed number of OTUs are plotted against sampling depth. Sample numbers indicate patient designations.

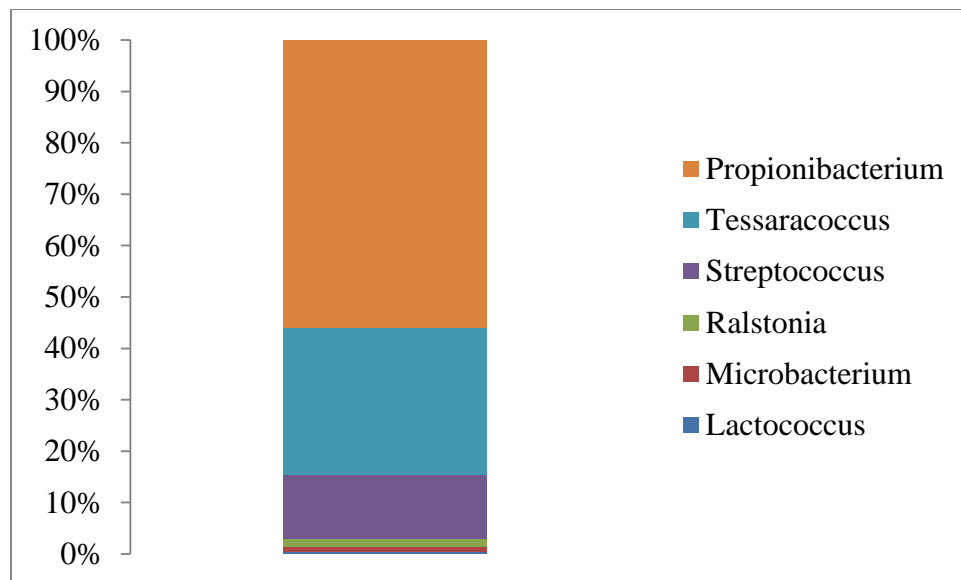

**Figure S2.** Breakdown of PMP core microbiome Actinobacteria that were classifiable at the genus level (Table 1). The percent of total Actinobacteria is shown for each taxon.

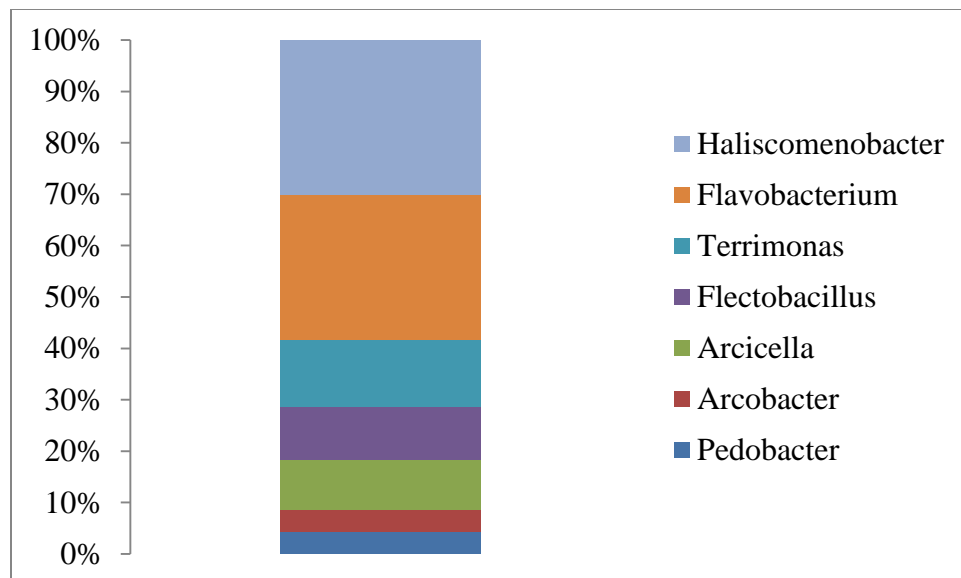

**Figure S3.** Breakdown of PMP core microbiome Bacteroidetes that were classifiable at the genus level (Table 1). The percent of total Bacteroidetes is shown for each taxon.

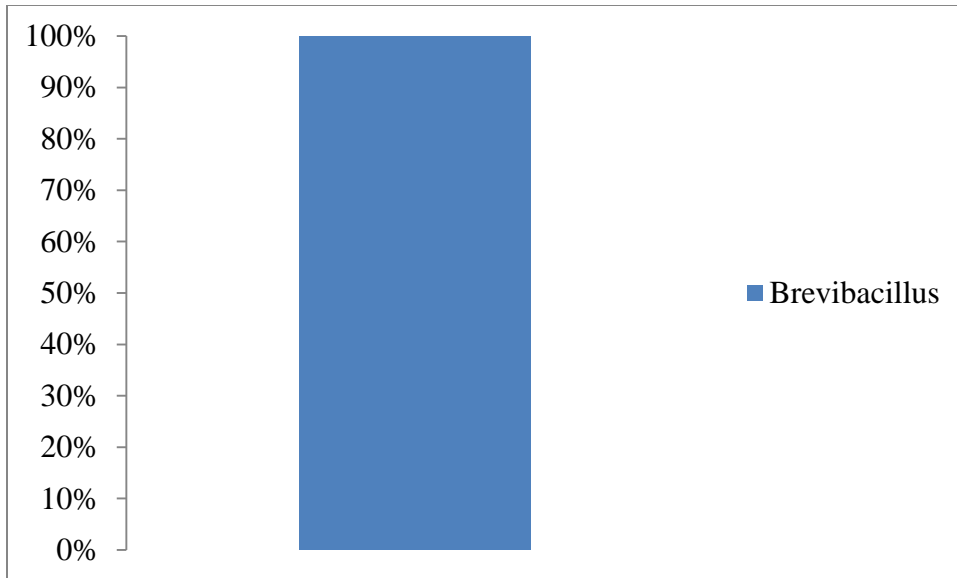

**Figure S4.** Breakdown of PMP core microbiome Firmicutes that were classifiable at the genus level (Table 1). *Brevibacillus* was the only Firmicute taxon identified at this level.

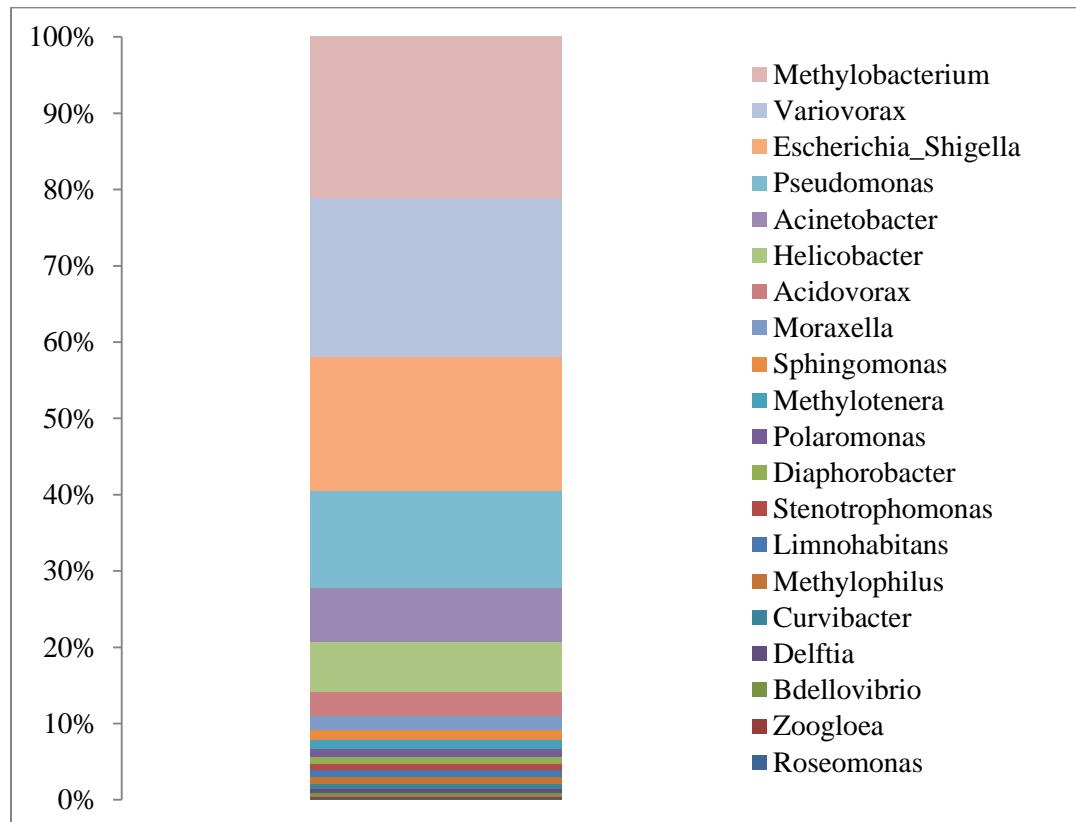

**Figure S5.** Breakdown of PMP core microbiome Proteobacteria that were classifiable at the genus level (Table 1). The percent of total Proteobacteria is shown for each taxon.

**Table S1. Complete breakdown of sequences in the PMP core microbiome**

| taxlevel | taxon                | total seqs | PMP Patient |        |       |       |       |        |       |        |       |       |       |
|----------|----------------------|------------|-------------|--------|-------|-------|-------|--------|-------|--------|-------|-------|-------|
|          |                      |            | 135         | 141    | 143   | 144   | 147   | 158    | 176   | 182    | 196   | 197   | 199   |
| 1        | Bacteria             | 941151     | 44786       | 101360 | 95784 | 71326 | 92474 | 141553 | 70443 | 109509 | 68398 | 63308 | 82210 |
| 2        | Actinobacteria       | 142834     | 3519        | 2439   | 16176 | 18766 | 4368  | 4596   | 19882 | 11693  | 20828 | 19774 | 20793 |
| 3        | Actinobacteria       | 142834     | 3519        | 2439   | 16176 | 18766 | 4368  | 4596   | 19882 | 11693  | 20828 | 19774 | 20793 |
| 4        | Actinomycetales      | 142834     | 3519        | 2439   | 16176 | 18766 | 4368  | 4596   | 19882 | 11693  | 20828 | 19774 | 20793 |
| 5        | Microbacteriaceae    | 19392      | 624         | 403    | 14687 | 552   | 951   | 127    | 584   | 74     | 655   | 439   | 296   |
| 6        | Microbacterium       | 1306       | 51          | 184    | 140   | 132   | 235   | 3      | 179   | 1      | 144   | 175   | 62    |
| 6        | unclassified         | 18086      | 573         | 219    | 14547 | 420   | 716   | 124    | 405   | 73     | 511   | 264   | 234   |
| 5        | Propionibacteriaceae | 123442     | 2895        | 2036   | 1489  | 18214 | 3417  | 4469   | 19298 | 11619  | 20173 | 19335 | 20497 |
| 6        | Propionibacterium    | 81731      | 893         | 1373   | 440   | 14357 | 1027  | 1912   | 14289 | 5331   | 15151 | 15135 | 11823 |
| 6        | Tessaracoccus        | 41711      | 2002        | 663    | 1049  | 3857  | 2390  | 2557   | 5009  | 6288   | 5022  | 4200  | 8674  |
| 2        | Bacteroidetes        | 21145      | 982         | 3299   | 1416  | 2730  | 5472  | 198    | 1875  | 300    | 2164  | 1720  | 989   |
| 3        | Sphingobacteria      | 15662      | 655         | 3029   | 878   | 1479  | 5145  | 159    | 1263  | 246    | 1361  | 846   | 601   |
| 4        | Sphingobacteriales   | 15662      | 655         | 3029   | 878   | 1479  | 5145  | 159    | 1263  | 246    | 1361  | 846   | 601   |
| 5        | Saprospiraceae       | 5883       | 116         | 1998   | 94    | 159   | 2979  | 11     | 147   | 75     | 152   | 1     | 151   |
| 6        | Halicomonobacter     | 5883       | 116         | 1998   | 94    | 159   | 2979  | 11     | 147   | 75     | 152   | 1     | 151   |
| 5        | Chitinophagaceae     | 2587       | 66          | 564    | 76    | 160   | 1341  | 33     | 57    | 17     | 111   | 37    | 125   |
| 6        | Terrimonas           | 2587       | 66          | 564    | 76    | 160   | 1341  | 33     | 57    | 17     | 111   | 37    | 125   |
| 5        | Cytophagaceae        | 3894       | 147         | 46     | 307   | 660   | 204   | 83     | 664   | 55     | 840   | 697   | 191   |
| 6        | Arcicella            | 1904       | 45          | 26     | 148   | 315   | 181   | 46     | 229   | 22     | 437   | 350   | 105   |
| 6        | Flectobacillus       | 1990       | 102         | 20     | 159   | 345   | 23    | 37     | 435   | 33     | 403   | 347   | 86    |
| 5        | Sphingobacteriaceae  | 834        | 2           | 9      | 41    | 141   | 3     | 14     | 305   | 44     | 211   | 49    | 15    |
| 6        | Pedobacter           | 834        | 2           | 9      | 41    | 141   | 3     | 14     | 305   | 44     | 211   | 49    | 15    |
| 5        | unclassified         | 2464       | 324         | 412    | 360   | 359   | 618   | 18     | 90    | 55     | 47    | 62    | 119   |
| 6        | unclassified         | 2464       | 324         | 412    | 360   | 359   | 618   | 18     | 90    | 55     | 47    | 62    | 119   |
| 3        | Flavobacteria        | 5483       | 327         | 270    | 538   | 1251  | 327   | 39     | 612   | 54     | 803   | 874   | 388   |
| 4        | Flavobacteriales     | 5483       | 327         | 270    | 538   | 1251  | 327   | 39     | 612   | 54     | 803   | 874   | 388   |
| 5        | Flavobacteriaceae    | 5483       | 327         | 270    | 538   | 1251  | 327   | 39     | 612   | 54     | 803   | 874   | 388   |
| 6        | Flavobacterium       | 5483       | 327         | 270    | 538   | 1251  | 327   | 39     | 612   | 54     | 803   | 874   | 388   |
| 2        | Proteobacteria       | 721710     | 29328       | 91740  | 74200 | 45311 | 63133 | 135968 | 45524 | 96214  | 42619 | 39604 | 58069 |
| 3        | Alphaproteobacteria  | 115437     | 761         | 27438  | 9287  | 9690  | 18950 | 13725  | 3346  | 23313  | 3467  | 2802  | 2658  |
| 4        | Rhizobiales          | 106626     | 590         | 27232  | 6369  | 7740  | 18704 | 13384  | 2604  | 23141  | 2437  | 2350  | 2075  |
| 5        | Methylobacteriaceae  | 106626     | 590         | 27232  | 6369  | 7740  | 18704 | 13384  | 2604  | 23141  | 2437  | 2350  | 2075  |
| 6        | Methylobacterium     | 106626     | 590         | 27232  | 6369  | 7740  | 18704 | 13384  | 2604  | 23141  | 2437  | 2350  | 2075  |
| 4        | Rhodospirillales     | 633        | 4           | 29     | 7     | 48    | 4     | 33     | 144   | 10     | 185   | 83    | 86    |
| 5        | Acetobacteraceae     | 633        | 4           | 29     | 7     | 48    | 4     | 33     | 144   | 10     | 185   | 83    | 86    |
| 6        | Roseomonas           | 633        | 4           | 29     | 7     | 48    | 4     | 33     | 144   | 10     | 185   | 83    | 86    |
| 4        | Sphingomonadales     | 8178       | 167         | 177    | 2911  | 1902  | 242   | 308    | 598   | 162    | 845   | 369   | 497   |
| 5        | Sphingomonadaceae    | 8178       | 167         | 177    | 2911  | 1902  | 242   | 308    | 598   | 162    | 845   | 369   | 497   |
| 6        | Sphingomonas         | 6731       | 146         | 113    | 2910  | 1685  | 216   | 182    | 497   | 120    | 550   | 176   | 136   |
| 6        | unclassified         | 1447       | 21          | 64     | 1     | 217   | 26    | 126    | 101   | 42     | 295   | 193   | 361   |
| 3        | Betaproteobacteria   | 275417     | 4035        | 51676  | 8729  | 17192 | 34982 | 31766  | 12777 | 63928  | 13780 | 12375 | 24177 |
| 4        | Burkholderiales      | 255953     | 3237        | 47179  | 8563  | 15417 | 30563 | 31588  | 11977 | 63198  | 12289 | 9603  | 22339 |
| 5        | Burkholderiaceae     | 72253      | 355         | 39980  | 763   | 3400  | 21647 | 540    | 1124  | 980    | 1198  | 756   | 1510  |
| 6        | Ralstonia            | 2372       | 58          | 306    | 153   | 725   | 137   | 180    | 127   | 174    | 181   | 121   | 210   |
| 6        | unclassified         | 69881      | 297         | 39674  | 610   | 2675  | 21510 | 360    | 997   | 806    | 1017  | 635   | 1300  |
| 5        | Comamonadaceae       | 145981     | 2241        | 3307   | 6624  | 9161  | 4929  | 30567  | 6872  | 61332  | 9697  | 7173  | 4078  |
| 6        | Acidovorax           | 15911      | 660         | 1752   | 3650  | 1800  | 2866  | 344    | 619   | 681    | 1483  | 1069  | 987   |
| 6        | Curvibacter          | 3149       | 267         | 186    | 451   | 665   | 326   | 225    | 218   | 16     | 300   | 303   | 192   |
| 6        | Delftia              | 2904       | 32          | 14     | 21    | 623   | 17    | 89     | 1186  | 9      | 565   | 186   | 162   |
| 6        | Diaphorobacter       | 4616       | 41          | 1      | 22    | 193   | 7     | 153    | 618   | 478    | 2296  | 44    | 763   |
| 6        | Limnhabitans         | 4453       | 314         | 378    | 679   | 1238  | 435   | 174    | 228   | 98     | 399   | 325   | 185   |
| 6        | Polaromonas          | 5046       | 144         | 109    | 193   | 752   | 136   | 417    | 285   | 419    | 1219  | 1076  | 296   |
| 6        | Variovorax           | 104621     | 575         | 662    | 1361  | 3236  | 865   | 28999  | 2689  | 59409  | 2787  | 2947  | 1091  |
| 6        | unclassified         | 5281       | 208         | 205    | 247   | 654   | 277   | 166    | 1029  | 222    | 648   | 1223  | 402   |
| 5        | unclassified         | 37719      | 641         | 3892   | 1176  | 2856  | 3987  | 481    | 3981  | 886    | 1394  | 1674  | 16751 |
| 6        | unclassified         | 37719      | 641         | 3892   | 1176  | 2856  | 3987  | 481    | 3981  | 886    | 1394  | 1674  | 16751 |
| 4        | Hydrogenophilales    | 2865       | 17          | 74     | 2     | 445   | 12    | 6      | 170   | 223    | 276   | 816   | 824   |
| 5        | Hydrogenophilaceae   | 2865       | 17          | 74     | 2     | 445   | 12    | 6      | 170   | 223    | 276   | 816   | 824   |
| 6        | Hydrogenophilus      | 2865       | 17          | 74     | 2     | 445   | 12    | 6      | 170   | 223    | 276   | 816   | 824   |
| 4        | Methylophilales      | 10486      | 587         | 2941   | 101   | 1043  | 2883  | 7      | 312   | 197    | 793   | 1404  | 218   |
| 5        | Methylophilaceae     | 10486      | 587         | 2941   | 101   | 1043  | 2883  | 7      | 312   | 197    | 793   | 1404  | 218   |
| 6        | Methylophilus        | 4389       | 495         | 499    | 40    | 628   | 301   | 1      | 279   | 145    | 628   | 1224  | 149   |
| 6        | Methylotenera        | 6097       | 92          | 2442   | 61    | 415   | 2582  | 6      | 33    | 52     | 165   | 180   | 69    |
| 4        | Rhodocyclales        | 1663       | 34          | 49     | 10    | 28    | 101   | 103    | 206   | 195    | 141   | 159   | 637   |
| 5        | Rhodocyclaceae       | 1663       | 34          | 49     | 10    | 28    | 101   | 103    | 206   | 195    | 141   | 159   | 637   |
| 6        | Zoogloea             | 1663       | 34          | 49     | 10    | 28    | 101   | 103    | 206   | 195    | 141   | 159   | 637   |
| 4        | unclassified         | 4450       | 160         | 1433   | 53    | 259   | 1423  | 62     | 112   | 115    | 281   | 393   | 159   |
| 5        | unclassified         | 4450       | 160         | 1433   | 53    | 259   | 1423  | 62     | 112   | 115    | 281   | 393   | 159   |
| 6        | unclassified         | 4450       | 160         | 1433   | 53    | 259   | 1423  | 62     | 112   | 115    | 281   | 393   | 159   |

**Table S1 (cont.)**

|              |                       | <b>PMP Patient</b> |            |            |            |            |            |            |            |            |            |            |       |
|--------------|-----------------------|--------------------|------------|------------|------------|------------|------------|------------|------------|------------|------------|------------|-------|
| <b>taxon</b> | <b>total seqs</b>     | <b>135</b>         | <b>141</b> | <b>143</b> | <b>144</b> | <b>147</b> | <b>158</b> | <b>176</b> | <b>182</b> | <b>196</b> | <b>197</b> | <b>199</b> |       |
| 3            | Deltaproteobacteria   | 2288               | 12         | 148        | 15         | 283        | 59         | 93         | 354        | 106        | 569        | 448        | 201   |
| 4            | Bdellovibrionales     | 2288               | 12         | 148        | 15         | 283        | 59         | 93         | 354        | 106        | 569        | 448        | 201   |
| 5            | Bdellovibrionaceae    | 2288               | 12         | 148        | 15         | 283        | 59         | 93         | 354        | 106        | 569        | 448        | 201   |
| 6            | Bdellovibrio          | 2288               | 12         | 148        | 15         | 283        | 59         | 93         | 354        | 106        | 569        | 448        | 201   |
| 3            | Epsilonproteobacteria | 34289              | 27         | 6990       | 975        | 3467       | 653        | 434        | 4945       | 521        | 4355       | 6873       | 5049  |
| 4            | Campylobacteriales    | 34289              | 27         | 6990       | 975        | 3467       | 653        | 434        | 4945       | 521        | 4355       | 6873       | 5049  |
| 5            | Campylobacteraceae    | 848                | 11         | 5          | 69         | 142        | 55         | 47         | 138        | 33         | 163        | 57         | 128   |
| 6            | Arcobacter            | 848                | 11         | 5          | 69         | 142        | 55         | 47         | 138        | 33         | 163        | 57         | 128   |
| 5            | Helicobacteraceae     | 33441              | 16         | 6985       | 906        | 3325       | 598        | 387        | 4807       | 488        | 4192       | 6816       | 4921  |
| 6            | Helicobacter          | 33441              | 16         | 6985       | 906        | 3325       | 598        | 387        | 4807       | 488        | 4192       | 6816       | 4921  |
| 3            | Gammaproteobacteria   | 285025             | 24403      | 2251       | 55089      | 14108      | 5078       | 89765      | 23757      | 8058       | 19987      | 16786      | 25743 |
| 4            | Enterobacteriales     | 107398             | 693        | 465        | 656        | 1829       | 1093       | 88561      | 3155       | 1904       | 1886       | 2270       | 4886  |
| 5            | Enterobacteriaceae    | 107398             | 693        | 465        | 656        | 1829       | 1093       | 88561      | 3155       | 1904       | 1886       | 2270       | 4886  |
| 6            | Escherichia_Shigella  | 88823              | 302        | 343        | 360        | 1660       | 417        | 73796      | 2583       | 1528       | 1576       | 2012       | 4246  |
| 6            | unclassified          | 18575              | 391        | 122        | 296        | 169        | 676        | 14765      | 572        | 376        | 310        | 258        | 640   |
| 4            | Alteromonadales       | 42103              | 17755      | 216        | 142        | 2208       | 282        | 208        | 3965       | 1447       | 4887       | 3009       | 7984  |
| 5            | Alteromonadaceae      | 42103              | 17755      | 216        | 142        | 2208       | 282        | 208        | 3965       | 1447       | 4887       | 3009       | 7984  |
| 6            | unclassified          | 42103              | 17755      | 216        | 142        | 2208       | 282        | 208        | 3965       | 1447       | 4887       | 3009       | 7984  |
| 4            | Chromatiales          | 424                | 79         | 17         | 17         | 2208       | 6          | 60         | 1          | 31         | 15         | 107        | 37    |
| 5            | unclassified          | 424                | 79         | 17         | 17         | 2208       | 6          | 60         | 1          | 31         | 15         | 107        | 37    |
| 6            | unclassified          | 424                | 79         | 17         | 17         | 2208       | 6          | 60         | 1          | 31         | 15         | 107        | 37    |
| 4            | Pseudomonadales       | 108442             | 4697       | 795        | 53329      | 2208       | 2892       | 559        | 13472      | 3489       | 8495       | 5474       | 9205  |
| 5            | Moraxellaceae         | 44405              | 1338       | 538        | 839        | 2208       | 399        | 211        | 12912      | 2420       | 7711       | 4917       | 8382  |
| 6            | Acinetobacter         | 35628              | 1334       | 359        | 832        | 2208       | 392        | 190        | 11835      | 2365       | 6521       | 3361       | 4867  |
| 6            | Moraxella             | 8777               | 4          | 179        | 7          | 2208       | 7          | 21         | 1077       | 55         | 1190       | 1556       | 3515  |
| 5            | Pseudomonadaceae      | 64037              | 3359       | 257        | 52490      | 2208       | 2493       | 348        | 560        | 1069       | 784        | 557        | 823   |
| 6            | Pseudomonas           | 64037              | 3359       | 257        | 52490      | 2208       | 2493       | 348        | 560        | 1069       | 784        | 557        | 823   |
| 4            | Xanthomonadales       | 4565               | 67         | 145        | 11         | 2208       | 88         | 103        | 1259       | 240        | 951        | 345        | 475   |
| 5            | Xanthomonadaceae      | 4565               | 67         | 145        | 11         | 2208       | 88         | 103        | 1259       | 240        | 951        | 345        | 475   |
| 6            | Stenotrophomonas      | 4565               | 67         | 145        | 11         | 2208       | 88         | 103        | 1259       | 240        | 951        | 345        | 475   |
| 4            | unclassified          | 22093              | 1112       | 613        | 934        | 2208       | 717        | 274        | 1905       | 947        | 3753       | 5581       | 3156  |
| 5            | unclassified          | 22093              | 1112       | 613        | 934        | 2208       | 717        | 274        | 1905       | 947        | 3753       | 5581       | 3156  |
| 6            | unclassified          | 22093              | 1112       | 613        | 934        | 2208       | 717        | 274        | 1905       | 947        | 3753       | 5581       | 3156  |
| 3            | unclassified          | 9254               | 90         | 3237       | 105        | 2208       | 3411       | 185        | 345        | 288        | 461        | 320        | 241   |
| 4            | unclassified          | 9254               | 90         | 3237       | 105        | 2208       | 3411       | 185        | 345        | 288        | 461        | 320        | 241   |
| 5            | unclassified          | 9254               | 90         | 3237       | 105        | 2208       | 3411       | 185        | 345        | 288        | 461        | 320        | 241   |
| 6            | unclassified          | 9254               | 90         | 3237       | 105        | 2208       | 3411       | 185        | 345        | 288        | 461        | 320        | 241   |
| 2            | Firmicutes            | 53508              | 10849      | 3640       | 3887       | 4112       | 19375      | 730        | 2815       | 1229       | 2513       | 2147       | 2211  |
| 3            | Bacilli               | 39109              | 5488       | 2116       | 1704       | 2812       | 17558      | 699        | 1531       | 1067       | 2123       | 2053       | 1958  |
| 4            | Bacillales            | 13232              | 4716       | 1855       | 1344       | 1609       | 1706       | 265        | 213        | 283        | 256        | 307        | 678   |
| 5            | Paenibacillaceae_1    | 4674               | 880        | 726        | 13         | 1344       | 21         | 204        | 181        | 275        | 205        | 216        | 609   |
| 6            | Brevibacillus         | 4674               | 880        | 726        | 13         | 1344       | 21         | 204        | 181        | 275        | 205        | 216        | 609   |
| 5            | unclassified          | 8558               | 3836       | 1129       | 1331       | 265        | 1685       | 61         | 32         | 8          | 51         | 91         | 69    |
| 6            | unclassified          | 8558               | 3836       | 1129       | 1331       | 265        | 1685       | 61         | 32         | 8          | 51         | 91         | 69    |
| 4            | Lactobacillales       | 20614              | 622        | 142        | 307        | 662        | 14443      | 320        | 880        | 586        | 992        | 770        | 890   |
| 5            | Lactobacillaceae      | 777                | 140        | 5          | 35         | 47         | 119        | 31         | 73         | 59         | 116        | 80         | 72    |
| 6            | Lactobacillus         | 777                | 140        | 5          | 35         | 47         | 119        | 31         | 73         | 59         | 116        | 80         | 72    |
| 5            | Streptococcaceae      | 18754              | 434        | 112        | 217        | 583        | 14191      | 262        | 582        | 438        | 744        | 506        | 685   |
| 6            | Lactococcus           | 767                | 38         | 29         | 14         | 98         | 58         | 18         | 122        | 29         | 251        | 109        | 1     |
| 6            | Streptococcus         | 17987              | 396        | 83         | 203        | 485        | 14133      | 244        | 460        | 409        | 493        | 397        | 684   |
| 5            | unclassified          | 1083               | 48         | 25         | 55         | 32         | 133        | 27         | 225        | 89         | 132        | 184        | 133   |
| 6            | unclassified          | 1083               | 48         | 25         | 55         | 32         | 133        | 27         | 225        | 89         | 132        | 184        | 133   |
| 4            | unclassified          | 5263               | 150        | 119        | 53         | 541        | 1409       | 114        | 438        | 198        | 875        | 976        | 390   |
| 5            | unclassified          | 5263               | 150        | 119        | 53         | 541        | 1409       | 114        | 438        | 198        | 875        | 976        | 390   |
| 6            | unclassified          | 5263               | 150        | 119        | 53         | 541        | 1409       | 114        | 438        | 198        | 875        | 976        | 390   |
| 3            | unclassified          | 14399              | 5361       | 1524       | 2183       | 1300       | 1817       | 31         | 1284       | 162        | 390        | 94         | 253   |
| 4            | unclassified          | 14399              | 5361       | 1524       | 2183       | 1300       | 1817       | 31         | 1284       | 162        | 390        | 94         | 253   |
| 5            | unclassified          | 14399              | 5361       | 1524       | 2183       | 1300       | 1817       | 31         | 1284       | 162        | 390        | 94         | 253   |
| 6            | unclassified          | 14399              | 5361       | 1524       | 2183       | 1300       | 1817       | 31         | 1284       | 162        | 390        | 94         | 253   |
